# Supplementary material for: Spectroscopic Analyses Highlight Plant Biostimulant Effects of Baker’s Yeast Vinasse and Selenium on Cabbage through Foliar Fertilization
Source: MDPI journal article supplement (doi:10.3390/plants12163016), 2023-08-21
Supplement: s1 [file s1]

## Supplementary Materials

### ATR-FTIR spectroscopy of cellulose, pectin, and lignin

For a better understanding of the FTIR spectra of cabbage samples and the effect of Se-VF, control spectra of MCC, Pct, and Lgn were recorded and overlaid in Figure S1 and we give here a detailed characterization of the bands.

MCC has a peak maximum at  $3331\text{ cm}^{-1}$  and a shoulder at  $3279\text{ cm}^{-1}$  assigned to cellulose I $\beta$ , the I $\alpha$  allomorph being metastable [164,167] and sensitive in the hydrolytic obtaining of MCC. These assignments correlate with the prevalence of I $\alpha$  towards I $\beta$  in bacterial cellulose and some algae compared with higher plants [163–165], and also with the FTIR theory in which strong bonds or structures (I $\beta$ >I $\alpha$ ) vibrate at higher frequencies (wavenumbers). Compared to MCC, Lgn has a broad absorption band due to its polyphenolic structure and a peak of reduced intensity at  $3362\text{ cm}^{-1}$  in the hydrogen bonds region, which suggests, along with other spectral particularities later mentioned, that the Kraft lignin used in this analysis is predominantly a softwood type, the hardwood lignin spectrum being more sharp in this region with a peak around  $3421\text{ cm}^{-1}$  [186]. Pectin (Pct) has more hydroxyl groups than Lgn but less than MCC, occurring from the galactose hydroxyls and galacturonic acid carboxyl moieties [78,118,168,176].

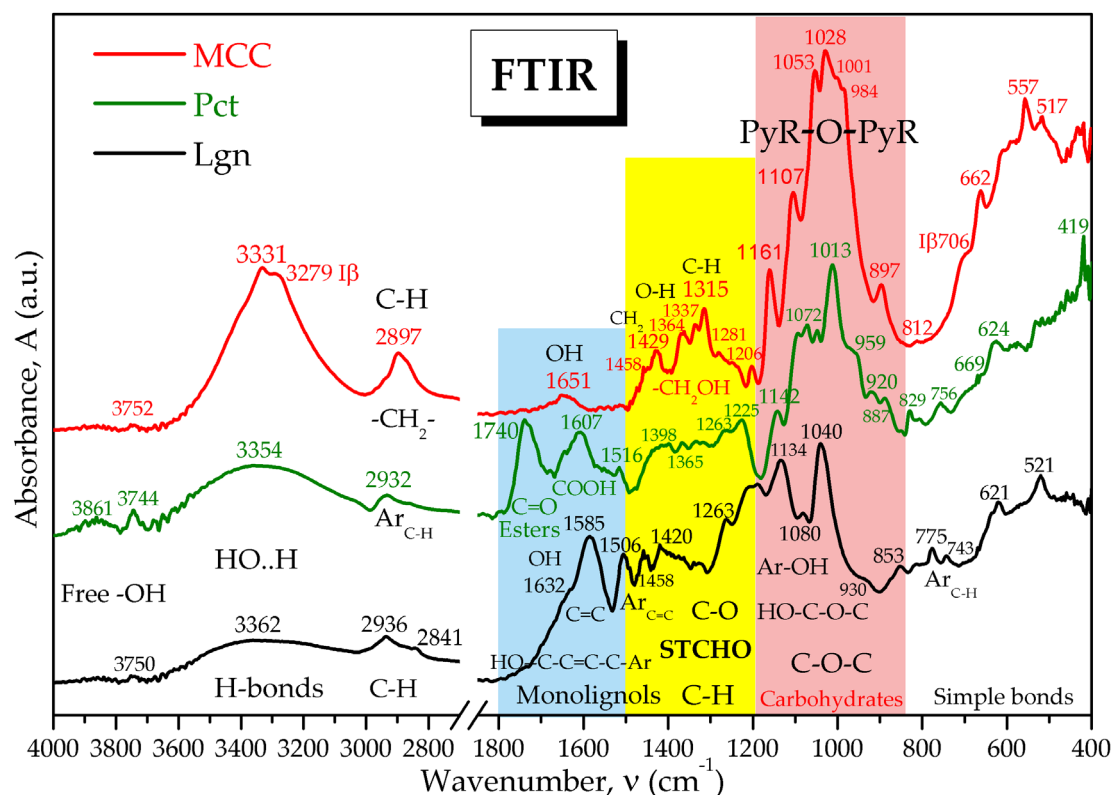

Figure S1. FTIR spectra of microcrystalline cellulose (MCC), pectin (Pct) and lignin (Lgn).

Table  $3000.\text{ cm}^{-1}$  is generally assigned to the C-H stretching vibrations coupled with adjacent functional groups [78,118,128,131,159,161,168,176,]. Pectin has a weak and broad C-H band with a peak at  $2932\text{ cm}^{-1}$  (or  $2939\text{ cm}^{-1}$  [168,176]), band assigned to aromatic C-H bonds and chelate OH groups. Lignin C-H band has the lowest intensity, while the peaks at  $2936$  and  $2841\text{ cm}^{-1}$  suggest the asymmetric, respectively symmetric stretching vibrations of  $-\text{C}-\text{H}$  and  $-\text{CH}_2-$  in unsaturated alcohol moieties and aromatic rings of monolignols (guaiacyl, coniferyl, syringyl alcohols) [128,187].

In the first diagnostic region 4000-3000  $\text{cm}^{-1}$ , characteristic to free and hydrogen-bound -OH or -NH<sub>2</sub>, MCC has a peak maximum at 3331  $\text{cm}^{-1}$  and a shoulder at 3279  $\text{cm}^{-1}$  assigned to cellulose I $\beta$ , the I $\alpha$  allomorph being metastable [164,167] and sensitive to the hydrolytic process of obtaining MCC. These assignments correlate with the prevalence of I $\alpha$  towards I $\beta$  in bacterial cellulose and some algae compared with higher plants [163–165], and also with the FTIR theory in which strong bonds or structures (I $\beta$ >I $\alpha$ ) vibrate at higher frequencies (wavenumbers). Compared to MCC, Lgn has a broad absorption band due to its polyphenolic structure and a peak of reduced intensity at 3362  $\text{cm}^{-1}$  in the hydrogen bonds region, which suggests, along with other spectral particularities later mentioned, that the Kraft lignin used in this analysis is predominantly a softwood type, the hardwood lignin spectrum being more sharp in this region with a peak around 3421  $\text{cm}^{-1}$  [186]. Pectin (Pct) has more hydroxyl groups than Lgn but less than MCC, occurring from the galactose hydroxyls and galacturonic acid carboxyl moieties [78,118,168,176].

The last diagnostic region (1800-1500  $\text{cm}^{-1}$ ), sometimes considered the first fingerprint region, can be seen as the shrinking mirror of the 3600-3000  $\text{cm}^{-1}$  region at half wavenumbers, also specific for -O-H and for hydrogen bonds with crystallization water [161,188]. In this region MCC has one defined peak at 1651  $\text{cm}^{-1}$  corresponding to -OH involved in inter- and intramolecular H-bonds and with crystallization water. Pct has a strong absorption band at 1740 $\pm$ 50  $\text{cm}^{-1}$  assigned to C=O vibration in esterified carbonyl COOR [78,93,118,119,159,168], being a reference band for the esterification degree of pectins in comparison with the free carboxyl groups -COOH around 1630-1645  $\text{cm}^{-1}$  [118,119,121]. Lgn has a strong absorption band at 1585  $\text{cm}^{-1}$  corresponding to aromatic ring vibrations [186], more exactly to conjugated phenols [128], and a front shoulder around 1632  $\text{cm}^{-1}$  corresponding to aliphatic C=C stretching vibration combined with C-OH like in  $\alpha,\beta$ -unsaturated alcohols, this band describing very well the structural vibrations of monolignols like *p*-coumaryl, coniferyl and synapyl alcohols. The next band at 1506  $\text{cm}^{-1}$  is specific for Lgn since it corresponds to aromatic C=C ring vibration (Arc=C) [128,186].

The fingerprint region 1500-400  $\text{cm}^{-1}$  contains "a forest of signals" specific to different vibration-rotation movements of intra-molecular bonds and functional groups induced by medium and low infrared energies, and it is generally recognized as very difficult, for complex samples, to be fully described since for a molecule with N atoms are theoretically possible 3N-6 fundamental vibrations [93]. At a first look, clearly distinguishable for MCC, the fingerprint region seems to be divided in three groups of signals: the first group of bands, between 1500-1200  $\text{cm}^{-1}$ , corresponds to C-H bending vibrations in gluco-pyranosic rings (PyR) and scissoring of lateral -C<sup>6</sup>H<sub>2</sub>-OH [177], coupled with O-H bending. The second group of absorption bands, 1200-850  $\text{cm}^{-1}$  is named the polysaccharides band and corresponds to various C-O bonds like C-OH, C-O-C pyranosic, respectively C-O-C glycosidic bond. The third and last group, between 850-400  $\text{cm}^{-1}$ , corresponds to rocking and wagging vibrations of single bonds.

The pioneering FTIR study of Tsuboi in 1957 [161] on the fingerprint region of cellulose identified nine bands in the absorption region 1500-1200  $\text{cm}^{-1}$ , out of which four were polarized parallel (1426, 1365, 1275 and 1232  $\text{cm}^{-1}$ ) and five perpendicular (1446, 1335, 1310, 1249 and 1204  $\text{cm}^{-1}$ ) to the fiber axis. Further deuteration of amorphous cellulose with D<sub>2</sub>O and NaOD evidenced that the bands at 1446, 1335, 1232 and 1204  $\text{cm}^{-1}$  are influenced by hydrogen-bonding with D<sub>2</sub>O, therefore assigned to -OH in-plane deformation, while the bands at 1426, 1365, 1310, 1275 and 1249  $\text{cm}^{-1}$  are not affected by deuteration, therefore assigned to C-H deformation vibrations. In the polysaccharides region 1200-850  $\text{cm}^{-1}$ , Tsuboi [161] identified a number of ten absorption bands, respectively: 1161, 1117, 1106, 1078, 1069, 1030, 1006, 988, 965, and 895  $\text{cm}^{-1}$ , all ten showing parallel dichroism and grouped as C-O, C-C and CH<sub>2</sub> stretching and rocking vibrations. Although it is beyond the scope of the present study to exactly assign each absorption band to the exact type of atomic vibration-rotation due to the increasing difficulty with the complexity of the molecular system, particular vibrations are attempted in Table A1 by structural and spectral comparison between microcrystalline cellulose (MCC), pectin (Pct), and lignin (Lgn), while referring also to relevant studies.

**Table S1.** Assignment of FTIR absorption bands of MCC, Pct, Lgn and cabbage control Co.

| Bond/group                                                                                             | Wavenumbers ( $\nu$ ), $\text{cm}^{-1}$ , for:                                                   |                             |                                        |                             | Observations / References<br>(main tools [93,128,131,158,159,161,188])                                                                                                                                                                                                                                      |
|--------------------------------------------------------------------------------------------------------|--------------------------------------------------------------------------------------------------|-----------------------------|----------------------------------------|-----------------------------|-------------------------------------------------------------------------------------------------------------------------------------------------------------------------------------------------------------------------------------------------------------------------------------------------------------|
|                                                                                                        | Co-cabbage control outer leaves, MCC-<br>microcrystalline cellulose, Pct-pectin, Lgn-<br>lignin. |                             |                                        |                             |                                                                                                                                                                                                                                                                                                             |
|                                                                                                        | Co                                                                                               | MCC                         | Pct                                    | Lgn                         | PyR - pyran ring; Ar - aromatic ring; @ - around.                                                                                                                                                                                                                                                           |
| Free -OH                                                                                               | 3838±60<br>3740±40                                                                               | 3752±40                     | 3861±100<br>3744±40                    | 3750±40                     | -unassociated, free hydroxyl groups @3700 $\text{cm}^{-1}$ (@2.7 $\mu\text{m}$ [158]);                                                                                                                                                                                                                      |
| -H bonds with -OH<br>and/or -NH<br>-Ar-H and/or C-N..H<br>@3020 $\text{cm}^{-1}$                       | 3448±20<br>3281±200<br>3227±10<br>3082±20<br>3018±30                                             | s3331±250<br>3289 I $\beta$ | m3354±250                              | w3362±250<br>sh3022±5       | -between 3600-3400 $\text{cm}^{-1}$ might be assigned the single H-bonds, while between 3400-3000 $\text{cm}^{-1}$ might prevail the double H-bonds [160];<br>- I $\alpha$ @3240 $\text{cm}^{-1}$ , I $\beta$ @3275 $\text{cm}^{-1}$ [146,163,164];                                                         |
| - C-H coupled with -<br>OH in<br>-CH <sub>2</sub> -OH                                                  | sh2960<br>vs2920±30                                                                              | sh2968,<br>sh2943           | w2932                                  | w2936                       | -asym. $\nu\text{CH}_2\text{-OH}$ at 2967 $\text{cm}^{-1}$ [161] and H-bridge, in correlation with the region at half $\nu$ =1485-1455 $\text{cm}^{-1}$ ; - asym. -CH <sub>2</sub> - @2925 $\text{cm}^{-1}$ [128]; - C-H @3.4 $\mu\text{m}$ (@2941 $\text{cm}^{-1}$ ) [159];                                |
| - sym. C-H in -CH <sub>3</sub> ,<br>>CH <sub>2</sub> , C-H                                             | s2851±25                                                                                         | s2897±70                    | w2857±30                               | w2841±30                    | -C-H in cellulose [130,161] ;<br>-sym. -CH <sub>2</sub> - @2855 $\text{cm}^{-1}$ [128] or @2851 $\text{cm}^{-1}$ [161];                                                                                                                                                                                     |
| - C=O in COOR<br>@1740 $\text{cm}^{-1}$ and in<br>COOH @1730 $\text{cm}^{-1}$                          | s1738±50                                                                                         | -                           | s1740±50<br>sh1728±5                   | -                           | - C=O in esters @5.73 $\mu\text{m}$ (1745 $\text{cm}^{-1}$ ) [158,159];<br>- C=O @1736 $\text{cm}^{-1}$ in COOH [93];<br>- C=O in esterified carbonyl COOR in Pct [78,118,121,168];                                                                                                                         |
| -OH in PyR-OH,<br>CH <sub>2</sub> -OH and H-<br>bonds with H <sub>2</sub> O                            | sh1645±5                                                                                         | m1651±10                    | sh1645±5                               | sh1632±5                    | - @1645±5 $\text{cm}^{-1}$ -OH involved in H-bonds with crystallization H <sub>2</sub> O in polysaccharides [93];<br>- OH in C <sup>6</sup> -OH @1639 $\text{cm}^{-1}$ (@6.1 $\mu\text{m}$ ) [159];                                                                                                         |
| - C=O in aminoacids,<br>esters, amide I, with<br>amide II shoulders<br>for - C-N-H                     | s1603±10<br>sh1574                                                                               | -                           | s1607±30<br>sh1568<br>sh1551<br>sh1541 | -                           | - C=O in COOH @1612 $\text{cm}^{-1}$ [93], pectin carboxyls [118];<br>- C-N-H in amines and amides @1550 $\text{cm}^{-1}$ , C-N in amide II @1530 $\text{cm}^{-1}$ [126,128];                                                                                                                               |
| - Arc=C coupled with<br>C-H                                                                            | -                                                                                                | -                           | -                                      | s1585±50                    | - benzene ring in phenyl glycosides @1580 $\text{cm}^{-1}$ [93];<br>-aromatic C=C @6.35 $\mu\text{m}$ (@1575 $\text{cm}^{-1}$ ) [158], asymmetric;                                                                                                                                                          |
| - Arc=C coupled with<br>C-H,<br>- Ar-C=O for pectins                                                   | sh1522                                                                                           | -                           | 1516±10<br>Ar-C=O                      | s1506±25<br>sh1490<br>Arc=C | - aromatic C=C @6.65 $\mu\text{m}$ (@1504 $\text{cm}^{-1}$ ) [158], symmetric;<br>- C=O in COOH for Pct;<br>- aromatic / heterocyclic $\nu\text{C-C}$ @1490 $\text{cm}^{-1}$ [93];                                                                                                                          |
| C-H coupled with<br>>CH-OH, and<br>correlated with the<br>H-bridge @2xWN<br>2970-2920 $\text{cm}^{-1}$ | -                                                                                                | sh1474<br>sh1458            | -                                      | m1458,<br>sh1448            | - $\delta\text{C-H}$ in saccharides [188] with a shoulder for, most probably, -C <sup>6</sup> H <sub>2</sub> -OH in MCC;<br>-CH <sub>2</sub> -OH @1446 $\text{cm}^{-1}$ evidenced by deuteration [161];<br>- C-H bending @6.9 $\mu\text{m}$ (@1449 $\text{cm}^{-1}$ ), also named "crystalline band" [158]; |
| C-H , -CH <sub>2</sub> -                                                                               | m1423±20                                                                                         | m1429±5                     | w1427±5                                | w1420±10                    | -CH <sub>2</sub> - @6.95 $\mu\text{m}$ , (@1439 $\text{cm}^{-1}$ ) [158], CH <sub>2</sub> sym. bend @1426 $\text{cm}^{-1}$ unaffected by deuteration [161];                                                                                                                                                 |
| C-H in -CH <sub>3</sub> , -CH <sub>2</sub> ,-<br>C <sup>6</sup> H <sub>2</sub> -OH                     | s1367±10                                                                                         | m1364                       | w1365±10                               | w1364±10                    | - sym. parallel C-H @1365 $\text{cm}^{-1}$ unaffected by deuteration [161]; -CH <sub>3</sub> in cellulose acetate @7.2 $\mu\text{m}$ (@1389 $\text{cm}^{-1}$ ) [159];                                                                                                                                       |
| C-OH and Ar-OH                                                                                         | -                                                                                                | w1337                       | w1332                                  | w1339                       | -C-OH @1335 $\text{cm}^{-1}$ evidenced by deuteration [161];                                                                                                                                                                                                                                                |
| C-H                                                                                                    | -                                                                                                | m1315                       | w1319                                  | w1327                       | -C-H as. perpendicular, unaffected by deuteration [161];                                                                                                                                                                                                                                                    |
| C-H and O-H in -<br>CH <sub>2</sub> -OH                                                                | -                                                                                                | w1281<br>w1248              | w1263                                  | s1263                       | -OH in -C <sup>6</sup> H <sub>2</sub> -OH @7.8 $\mu\text{m}$ (@1282 $\text{cm}^{-1}$ ) [159];<br>-C-H unaffected by deuteration @1275 $\text{cm}^{-1}$ and @1249 $\text{cm}^{-1}$ [161]; -CH-OH strong in lignin due to polyphenols;                                                                        |
| -CH <sub>2</sub> -OH<br>-CH <sub>2</sub> -O-CH <sub>2</sub> - - PyR-<br>O-PyR                          | s1221±40                                                                                         | w1234                       | m1225                                  | -                           | -C <sup>6</sup> H <sub>2</sub> -OH @1232 $\text{cm}^{-1}$ [161];<br>-C-O-C- in ester bond [159];<br>- PyR-O-PyRglycosidic link / aryl ethers [93];                                                                                                                                                          |
| -CH <sub>2</sub> -OH, -C <sup>6</sup> H <sub>2</sub> -OH                                               | -                                                                                                | w1206±5                     | -                                      | 1200±30<br>sh1211<br>s1188  | -bending of -CH <sub>2</sub> -OH (-C <sup>6</sup> H <sub>2</sub> -OH @1204 $\text{cm}^{-1}$ [161]), similar with trehalose, maltose and maltotriose [188];<br>-Ar-C-OH in monolignols - Lgn;                                                                                                                |

|                                   |        |               |               |              |                                                                                                                                                                                                                                     |
|-----------------------------------|--------|---------------|---------------|--------------|-------------------------------------------------------------------------------------------------------------------------------------------------------------------------------------------------------------------------------------|
| C-O-C coupled with C-OH / PyR-OH  | sh1144 | s1161         | m1142         | s1134        | -PyR-O-PyR asymmetric stretching of glycosidic linkage in polysaccharides [189]; - C-O-C alkyl ethers [93];<br>- ring skeleton @8.6 $\mu\text{m}$ (@1162 $\text{cm}^{-1}$ ) [159];                                                  |
| C-O-C cyclic                      | sh1092 | s1107         | m1094         | -            | - C-O-C cyclic in glucopyranosic ring (cyclic ethers [93]);                                                                                                                                                                         |
| C-O-C aliphatic                   | sh1063 | -             | m1072         | w1080        | -alkyl ethers C-O-C [93];                                                                                                                                                                                                           |
| C-O in C-OH                       | -      | s1053         | w1047         | vs1040       | - C-OH @1053 $\text{cm}^{-1}$ (@9.5 $\mu\text{m}$ ) in alcohols [159];                                                                                                                                                              |
| PyR-O-PyR                         | -      | vs1028        | -             | -            | -symmetric stretching of PyR-O-PyR glycosidic;                                                                                                                                                                                      |
| C-OH / C-O                        | s1016  | ah1001        | vs1013        | -            | -symmetric C-O vibration in MCC and Pct;                                                                                                                                                                                            |
| PyR-O-PyR / C-O-C/                | sh968  | sh984         | sh959         | -            | - glycosidic linkage in poly/oligo/saccharides [189], absent in monosaccharides and affected by acidic hydrolysis of oligosaccharides [188];                                                                                        |
| Ar-OH, COOH                       | -      | -             | w920          | sh930        | -COOH in Pct and Ar-OH in Lgn;                                                                                                                                                                                                      |
| PyR-O-PyR                         | sh901  | m897          | w887<br>sh849 | 853          | - glycosidic link [190,191] coupled with aromatic C-C(-O) or C-O-C inside PyR[192] ; -amorphous band @11 $\mu\text{m}$ (@909 $\text{cm}^{-1}$ ) and also -CH <sub>2</sub> - @11.15 $\mu\text{m}$ (@897 $\text{cm}^{-1}$ ) [158];    |
| PyR-C / C-C                       | sh831  | w812          | 829, 806      | 816          | - PyR-C in PyR-C-OH moiety for MCC;                                                                                                                                                                                                 |
| Arc-H                             | -      | -             | 756           | w775<br>w743 | -aromatic C-H @13 $\mu\text{m}$ (@769 $\text{cm}^{-1}$ ) [158]; - aryl and pyranose ring breathing @751 $\text{cm}^{-1}$ , Arc-H @755 $\text{cm}^{-1}$ [93];<br>- $\gamma$ C-H @745-755 $\text{cm}^{-1}$ in phenyl glycosides [93]; |
| -CH <sub>2</sub> -OH in I $\beta$ | -      | 706-I $\beta$ | -             | -            | - CH <sub>2</sub> rocking in I $\beta$ @710 $\text{cm}^{-1}$ [146];<br>- I $\beta$ @715 $\text{cm}^{-1}$ assigned to -CH <sub>2</sub> -OH [193];                                                                                    |
| PyR H-C-C-H C-OH                  | m660   | m662          | w669          | sh635        | - C-C rocking @690 $\text{cm}^{-1}$ in phenyl glycosides [93];<br>- C-O-H in cellulose perpendicular to plane [161]                                                                                                                 |
| C-H                               | m602   | w608, 592     | w624, 575     | w621         | - in-plane rocking vibrations of aliphatic C-H;                                                                                                                                                                                     |
| C-O                               | -      | m557          | w554          | -            | - in-plane rocking vibrations of C-O;                                                                                                                                                                                               |
| C-C, ArC-C, PyRC-C                | w523   | w517          | w532          | m521         | - in-plane rocking of C-C, aromatic / PyR breathing;                                                                                                                                                                                |
| C-C                               | s457   | sh434         | w457          | w457         | - C-C skeleton vibration / Ar ring vibration;                                                                                                                                                                                       |
| C-C-O                             | -      | m419          | m419          | -            | - C-O coupled with C-C in Pct and MCC.                                                                                                                                                                                              |

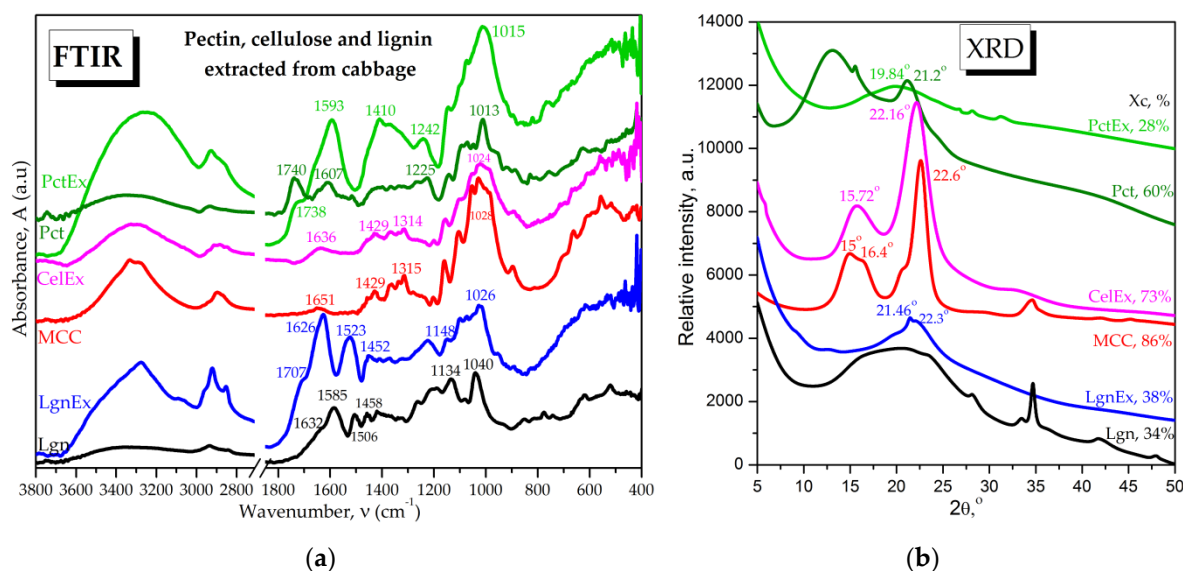

**Figure S2. (a)** FTIR spectra and **(b)** XRD diffractograms of extracted cabbage samples, compared with commercial controls: PctEx - pectin extracted from cabbage; Pct - commercial pectin from citrus peels; CelEx - cellulose extracted from cabbage; MCC - commercial microcrystalline cellulose; LgnEx - lignin extracted from cabbage; Lgn - commercial alkali lignin.

The spectral similarities between extracted pectin, cellulose and lignin from untreated cabbage and the commercial biocompounds are visible both in the FTIR spectroscopy and X-ray diffraction

presented in Figure S4, but also small particular differences can be observed. The extracted cellulose from cabbage presents the highest similitude degree with MCC both in FTIR and XRD analyses. FTIR similarities between CelEx and MCC are visible in all absorption bands, starting with the hydrogen bonds and C-H vibrations in the diagnostic region, followed by -OH bands around 1640  $\text{cm}^{-1}$ , the structural carbohydrates bands around 1429 and 1314  $\text{cm}^{-1}$  and the polysaccharides bands between 1200-850  $\text{cm}^{-1}$ . The two main diffraction peaks of CelEx at 15.72° and 22.16° are similar in intensity ratio between the two peaks with MCC, while the peak position suggests a higher cellulose Ia contribution in the cellulose from cabbage CelEx.

Extracted pectin PctEx shows FTIR spectral similarities with commercial Pct from citrus peels in the amide bands with peaks at 1738 and 1593  $\text{cm}^{-1}$ , in comparison with the peaks at 1740 and 1607  $\text{cm}^{-1}$ , although the intensities differ, the carboxylic band around 1593  $\text{cm}^{-1}$  being more intense in cabbage pectin PctEx. Also, the main C-O vibration at 1013  $\text{cm}^{-1}$  in Pct is similar with the one at 1015  $\text{cm}^{-1}$  in PctEx, while the adjacent -OH bands around 1100  $\text{cm}^{-1}$  together with the hydrogen band around 3300  $\text{cm}^{-1}$  suggests more -OH groups in PctEx. The XRD patterns of Pct and PctEx are different, suggesting different crystallization patterns between the two pectin samples. The XRD of PctEx is in agreement with the XRD of the cabbage sample (Figure 3). Regarding the two lignin samples, the FTIR spectra suggests a more aliphatic nature for the lignin from cabbage LgnEx with the sharp C-H absorption bands around 2900  $\text{cm}^{-1}$  and more C=O groups with the absorption band around 1707  $\text{cm}^{-1}$ . The polyphenolic structural similarities between LgnEx and Lgn are suggested by the bands around 1626, 1523, 1452, 1148 and 1026  $\text{cm}^{-1}$ . The XRD pattern of Lgn shows a broad diffraction pattern, and the LgnEx diffractogram is more centered around the 22° angle and suggests a more crystalline character, probably induced by the aliphatic chains observed in FTIR spectrum.

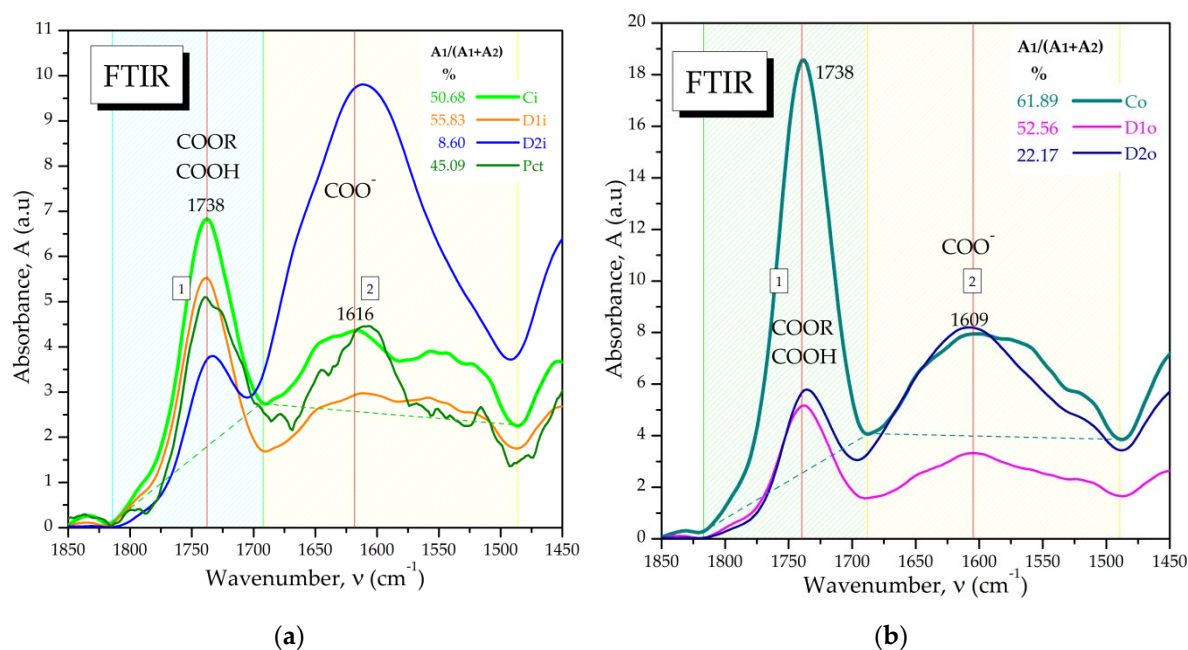

**Figure S3.** Integration of FTIR absorption bands of COOR/COOH @1738  $\text{cm}^{-1}$  and COO<sup>-</sup> @1610  $\text{cm}^{-1}$  and evaluation of the degree of methylesterification (DM, %) for: **(a)** Cabbage inner leaves and citrus pectin (Pct); **(b)** Cabbage outer leaves. Ci - control cabbage inner leaves; Co - control cabbage outer leaves; D1i - dosage 1 (1 L/ha) on inner leaves; D1o - dosage 1 on outer leaves; D2i - dosage 2 (3 L/ha) on inner leaves; D2o- dosage 2 on outer leaves.



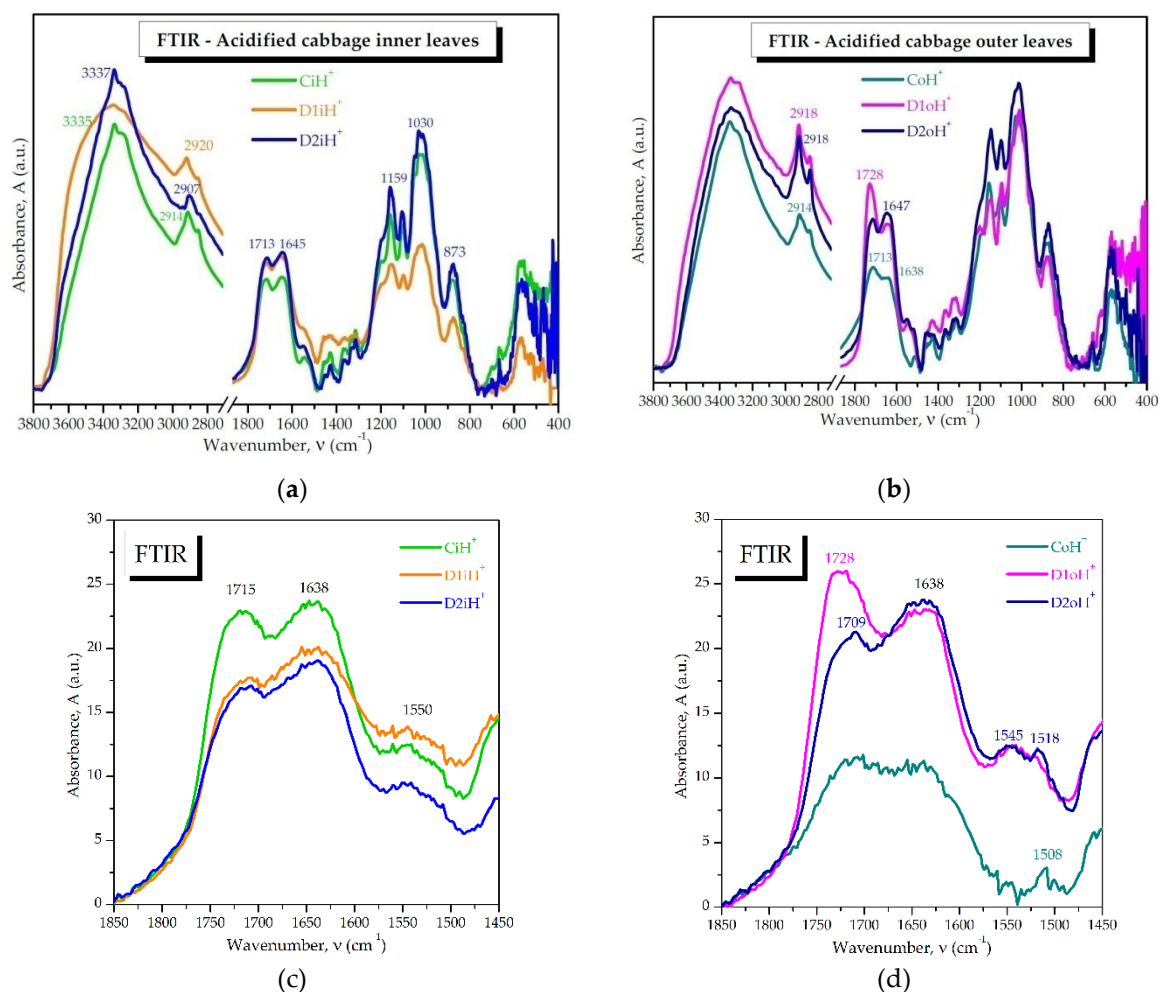

**Figure S4.** FTIR spectra of acidified cabbage samples: (a) Cabbage inner leaves; (b) Cabbage outer leaves; (c, d) Close view of the 1850-1450  $\text{cm}^{-1}$  FTIR region of inner leaves (c) and outer leaves (d). Ci - control cabbage inner leaves; Co - control cabbage outer leaves; D1i - dosage 1 (1 L/ha) on inner leaves; D1o - dosage 1 on outer leaves; D2i - dosage 2 (3 L/ha) on inner leaves; D2o - dosage 2 on outer leaves.

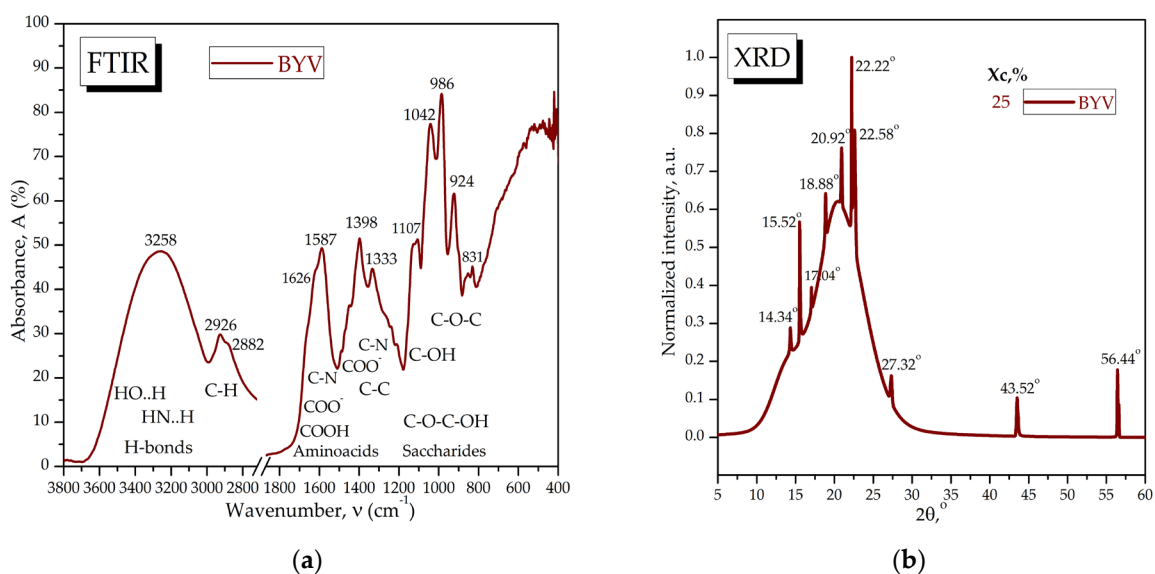

**Figure S5.** Characterization of baker's yeast vinasse: (a) FTIR spectrum; (b) X-ray diffractogram.

FTIR spectrum of BYV presented in Figure S5(a) is characterized in the diagnostic region by strong hydrogen bonds centered around  $3258\text{ cm}^{-1}$  originating from -OH, -COOH and -NH- groups, respectively C-H bonds vibration at  $2926$  and  $2882\text{ cm}^{-1}$  belonging to methyl groups in glycine betaine, aminoacids, sugars and other biocompounds. In the fingerprint region are differentiated the aminoacids band with a peak at  $1587\text{ cm}^{-1}$  for C-N bond and carboxyl ions, respectively a shoulder at  $1626\text{ cm}^{-1}$  for -COOH. The structural carbohydrates band in the region  $1500\text{--}1200\text{ cm}^{-1}$  presents two absorption peaks at  $1398$  and  $1333\text{ cm}^{-1}$ , assigned to carboxyl ions and C-N bonds vibration coupled with structural C-C bonds. BYV content of saccharides is depicted by the absorption band between  $1200\text{--}800\text{ cm}^{-1}$ , with absorption peaks at  $1107$ ,  $1042$ ,  $986$ ,  $924$  and  $831\text{ cm}^{-1}$  assigned to C-OH and C-O-C bonds vibration in sugars.

The XRD analysis presented in Figure S5(b) is evidencing a predominant amorphous character with a crystallinity degree of 25% with additional diffraction peaks characteristic for glycine betaine, glucose, fructose, and their combinations with acids and aminoacids like: alanyl glycine, allylglycine, betaine ascorbic acid, betaine citrate, betaine malonic acid, betaine oxalate, betaine succinic acid, betaine tartrate, carbonyl glycine, deoxyfructopyranosyl glycine, fructosazone, glucoseurea, glutaric acid glycine, glycine phtalic acid, glycine tartaric acid, glycyL-prolyl-leucyl-glycine, palmitoglycine, serylglycine, uracyl-carboxyethyl-glycine.
